# Supplementary material
Source: publisher figshare collection journal article supplement (https://acs.figshare.com/ndownloader/files/5217394)
Supplement: Supplementary file 1 [file 5217394]

data_global
_publ_contact_author              'Hanton, Lyall R.'
_publ_contact_author_email        lhanton@alkali.otago.ac.nz
_publ_author_address
;
Department of Chemistry
University of Otago
PO Box 56
Dunedin 
New Zealand
;
_publ_section_title                
;
Increasing structural dimensionality in Ag(I)
coordination polymers formed from the same
flexible multimodal thioether pyrazine ligand
;
loop_
_publ_author_name                 
'Amoore, Jarrod J. M.'
'Black, Cory A.'
'Hanton, Lyall R.'
'Spicer, Mark D.' 
_journal_name_full                'Crystal Growth & Design'
_journal_volume                   ?
_journal_page_first               ?
_journal_page_last                ?
_journal_year                     ?
_ccdc_journal_depnumber           ?
 
data_'[Ag2(L)](PF6)2.MeCN Compound 1.MeCN'

 
_audit_creation_method            SHELXL-97
_chemical_name_systematic
;
 ?
;
_chemical_name_common             ?
_chemical_melting_point           ?
_chemical_formula_moiety          ?
_chemical_formula_sum
 'C22 H25 Ag2 F12 N7 P2 S'
_chemical_formula_weight          925.23
 
loop_
 _atom_type_symbol
 _atom_type_description
 _atom_type_scat_dispersion_real
 _atom_type_scat_dispersion_imag
 _atom_type_scat_source
 'C'  'C'   0.0033   0.0016
 'International Tables Vol C Tables 4.2.6.8 and 6.1.1.4'
 'H'  'H'   0.0000   0.0000
 'International Tables Vol C Tables 4.2.6.8 and 6.1.1.4'
 'N'  'N'   0.0061   0.0033
 'International Tables Vol C Tables 4.2.6.8 and 6.1.1.4'
 'F'  'F'   0.0171   0.0103
 'International Tables Vol C Tables 4.2.6.8 and 6.1.1.4'
 'P'  'P'   0.1023   0.0942
 'International Tables Vol C Tables 4.2.6.8 and 6.1.1.4'
 'S'  'S'   0.1246   0.1234
 'International Tables Vol C Tables 4.2.6.8 and 6.1.1.4'
 'Ag'  'Ag'  -0.8971   1.1015
 'International Tables Vol C Tables 4.2.6.8 and 6.1.1.4'
 
_symmetry_cell_setting            monoclinic
_symmetry_space_group_name_H-M    P2/c
 
loop_
 _symmetry_equiv_pos_as_xyz
 'x, y, z'
 '-x, y, -z+1/2'
 '-x, -y, -z'
 'x, -y, z-1/2'
 
_cell_length_a                    16.309(3)
_cell_length_b                    14.636(3)
_cell_length_c                    13.941(4)
_cell_angle_alpha                 90.00
_cell_angle_beta                  93.67(3)
_cell_angle_gamma                 90.00
_cell_volume                      3320.9(13)
_cell_formula_units_Z             4
_cell_measurement_temperature     163(2)
_cell_measurement_reflns_used     6907
_cell_measurement_theta_min       1.87
_cell_measurement_theta_max       26.91
 
_exptl_crystal_description        plate
_exptl_crystal_colour             pale-orange
_exptl_crystal_size_max           0.50
_exptl_crystal_size_mid           0.35
_exptl_crystal_size_min           0.11
_exptl_crystal_density_meas       ?
_exptl_crystal_density_diffrn     1.851
_exptl_crystal_density_method     'not measured'
_exptl_crystal_F_000              1816
_exptl_absorpt_coefficient_mu     1.433
_exptl_absorpt_correction_type    multi-scan
_exptl_absorpt_correction_T_min   0.3295
_exptl_absorpt_correction_T_max   0.8542
_exptl_absorpt_process_details    'SADABS (Sheldrick 1996)'
 
_exptl_special_details
;
 ?
;
 
_diffrn_ambient_temperature       163(2)
_diffrn_radiation_wavelength      0.71073
_diffrn_radiation_type            MoK\a
_diffrn_radiation_source          'fine-focus sealed tube'
_diffrn_radiation_monochromator   graphite
_diffrn_measurement_device_type   'Bruker P4'
_diffrn_measurement_method        '\w scans'
_diffrn_detector_area_resol_mean  ?
_diffrn_standards_number          ?
_diffrn_standards_interval_count  ?
_diffrn_standards_interval_time   ?
_diffrn_standards_decay_%         2
_diffrn_reflns_number             39910
_diffrn_reflns_av_R_equivalents   0.0497
_diffrn_reflns_av_sigmaI/netI     0.0295
_diffrn_reflns_limit_h_min        -20
_diffrn_reflns_limit_h_max        20
_diffrn_reflns_limit_k_min        -10
_diffrn_reflns_limit_k_max        18
_diffrn_reflns_limit_l_min        -17
_diffrn_reflns_limit_l_max        17
_diffrn_reflns_theta_min          1.87
_diffrn_reflns_theta_max          26.91
_reflns_number_total              6907
_reflns_number_gt                 5677
_reflns_threshold_expression      >2sigma(I)
 
_computing_data_collection        'Bruker XSCANS'
_computing_cell_refinement        'Bruker XSCANS'
_computing_data_reduction         'Bruker SHELXTL'
_computing_structure_solution     'Bruker SHELXTL'
_computing_structure_refinement   'SHELXL-97 (Sheldrick, 1997)'
_computing_molecular_graphics     'Bruker SHELXTL'
_computing_publication_material   'Bruker SHELXTL'
 
_refine_special_details
;
 Refinement of F^2^ against ALL reflections.  The weighted R-factor wR and
 goodness of fit S are based on F^2^, conventional R-factors R are based
 on F, with F set to zero for negative F^2^. The threshold expression of
 F^2^ > 2sigma(F^2^) is used only for calculating R-factors(gt) etc. and is
 not relevant to the choice of reflections for refinement.  R-factors based
 on F^2^ are statistically about twice as large as those based on F, and R-
 factors based on ALL data will be even larger.
;
 
_refine_ls_structure_factor_coef  Fsqd
_refine_ls_matrix_type            full
_refine_ls_weighting_scheme       calc
_refine_ls_weighting_details
 'calc w=1/[\s^2^(Fo^2^)+(0.0248P)^2^+144.8577P] where P=(Fo^2^+2Fc^2^)/3'
_atom_sites_solution_primary      direct
_atom_sites_solution_secondary    difmap
_atom_sites_solution_hydrogens    geom
_refine_ls_hydrogen_treatment     constr
_refine_ls_extinction_method      none
_refine_ls_extinction_coef        ?
_refine_ls_number_reflns          6907
_refine_ls_number_parameters      420
_refine_ls_number_restraints      0
_refine_ls_R_factor_all           0.1154
_refine_ls_R_factor_gt            0.1027
_refine_ls_wR_factor_ref          0.2704
_refine_ls_wR_factor_gt           0.2656
_refine_ls_goodness_of_fit_ref    1.186
_refine_ls_restrained_S_all       1.186
_refine_ls_shift/su_max           0.000
_refine_ls_shift/su_mean          0.000
 
loop_
 _atom_site_label
 _atom_site_type_symbol
 _atom_site_fract_x
 _atom_site_fract_y
 _atom_site_fract_z
 _atom_site_U_iso_or_equiv
 _atom_site_adp_type
 _atom_site_occupancy
 _atom_site_symmetry_multiplicity
 _atom_site_calc_flag
 _atom_site_refinement_flags
 _atom_site_disorder_assembly
 _atom_site_disorder_group
C1 C 0.2425(8) 0.5744(9) 0.7690(10) 0.032(3) Uani 1 1 d . . .
H1 H 0.2905 0.5455 0.7921 0.039 Uiso 1 1 calc R . .
C2 C 0.2405(8) 0.6681(9) 0.7664(10) 0.031(3) Uani 1 1 d . . .
H2 H 0.2867 0.7008 0.7888 0.037 Uiso 1 1 calc R . .
C3 C 0.1070(7) 0.6619(9) 0.6999(9) 0.028(3) Uani 1 1 d . . .
H3 H 0.0593 0.6904 0.6751 0.034 Uiso 1 1 calc R . .
C4 C 0.1086(7) 0.5682(8) 0.7027(8) 0.024(2) Uani 1 1 d . . .
C5 C 0.0357(7) 0.5096(8) 0.6606(9) 0.026(2) Uani 1 1 d . . .
H5A H 0.0527 0.4757 0.6054 0.031 Uiso 1 1 calc R . .
H5B H -0.0092 0.5494 0.6388 0.031 Uiso 1 1 calc R . .
C6 C 0.1006(8) 0.1635(9) 0.8179(9) 0.029(3) Uani 1 1 d . . .
H6 H 0.0523 0.1900 0.8367 0.034 Uiso 1 1 calc R . .
C7 C 0.1067(8) 0.0679(8) 0.8133(9) 0.026(3) Uani 1 1 d . . .
C8 C 0.2328(8) 0.1758(10) 0.7685(11) 0.036(3) Uani 1 1 d . . .
H8 H 0.2779 0.2109 0.7540 0.043 Uiso 1 1 calc R . .
C9 C 0.2379(8) 1.0820(9) 0.7621(10) 0.032(3) Uani 1 1 d . . .
H9 H 0.2859 1.0557 0.7423 0.039 Uiso 1 1 calc R . .
C10 C 0.0368(8) 0.0073(8) 0.8437(10) 0.030(3) Uani 1 1 d . . .
H10A H -0.0087 0.0458 0.8602 0.036 Uiso 1 1 calc R . .
H10B H 0.0554 -0.0264 0.9009 0.036 Uiso 1 1 calc R . .
C11 C 0.2353(10) 0.4925(11) 1.0062(11) 0.043(3) Uani 1 1 d . . .
C12 C 0.2953(12) 0.5566(14) 1.0478(14) 0.064(5) Uani 1 1 d . . .
H12A H 0.2676 0.6045 1.0799 0.096 Uiso 1 1 calc R . .
H12B H 0.3259 0.5823 0.9978 0.096 Uiso 1 1 calc R . .
H12C H 0.3321 0.5253 1.0932 0.096 Uiso 1 1 calc R . .
C13 C 0.6100(11) 0.3693(10) 0.6338(12) 0.045(4) Uani 1 1 d . . .
C14 C 0.5293(13) 0.3660(14) 0.5827(14) 0.070(6) Uani 1 1 d . . .
H14A H 0.4986 0.4195 0.5978 0.105 Uiso 1 1 calc R . .
H14B H 0.5005 0.3125 0.6020 0.105 Uiso 1 1 calc R . .
H14C H 0.5356 0.3638 0.5148 0.105 Uiso 1 1 calc R . .
C15 C 0.8345(9) 0.8740(11) 0.9523(13) 0.046(4) Uani 1 1 d . . .
H15 H 0.8864 0.8537 0.9382 0.055 Uiso 1 1 calc R . .
C16 C 0.8183(11) 0.9599(19) 0.9535(12) 0.074(7) Uani 1 1 d . . .
H16 H 0.8612 1.0004 0.9452 0.089 Uiso 1 1 calc R . .
C17 C 0.7401(14) 0.9970(15) 0.9665(13) 0.067(5) Uani 1 1 d . . .
H17 H 0.7314 1.0598 0.9652 0.080 Uiso 1 1 calc R . .
C18 C 0.6770(13) 0.9372(18) 0.9813(16) 0.076(6) Uani 1 1 d . . .
H18 H 0.6251 0.9605 0.9908 0.091 Uiso 1 1 calc R . .
C19 C 0.6881(16) 0.8464(17) 0.9823(16) 0.080(7) Uani 1 1 d . . .
H19 H 0.6444 0.8066 0.9890 0.096 Uiso 1 1 calc R . .
C20 C 0.773(2) 0.8115(15) 0.9723(13) 0.096(10) Uani 1 1 d . . .
H20 H 0.7853 0.7496 0.9793 0.115 Uiso 1 1 calc R . .
C21 C 0.4614(15) 0.8744(17) 0.898(2) 0.105(10) Uani 1 1 d . . .
H21A H 0.4955 0.9229 0.8765 0.157 Uiso 1 1 calc R . .
H21B H 0.4889 0.8170 0.8908 0.157 Uiso 1 1 calc R . .
H21C H 0.4510 0.8837 0.9640 0.157 Uiso 1 1 calc R . .
C22 C 0.3838(13) 0.8737(11) 0.8398(16) 0.059(5) Uani 1 1 d . . .
N1 N 0.1764(6) 0.5222(7) 0.7387(8) 0.027(2) Uani 1 1 d . . .
N2 N 0.1714(7) 0.7150(7) 0.7315(8) 0.029(2) Uani 1 1 d . . .
N3 N 0.1647(7) 0.2184(7) 0.7950(8) 0.028(2) Uani 1 1 d . . .
N4 N 0.1745(6) 1.0269(7) 0.7839(8) 0.028(2) Uani 1 1 d . . .
N5 N 0.1867(10) 0.4421(10) 0.9720(10) 0.055(4) Uani 1 1 d . . .
N6 N 0.6725(9) 0.3716(9) 0.6755(14) 0.064(5) Uani 1 1 d . . .
N7 N 0.3233(9) 0.8736(10) 0.7965(13) 0.063(4) Uani 1 1 d . . .
F11 F 0.9485(8) 0.2077(8) 1.0848(9) 0.085(4) Uani 1 1 d . . .
F12 F 0.8602(10) 0.3147(9) 0.9061(8) 0.091(4) Uani 1 1 d . . .
F13 F 0.9908(7) 0.2996(8) 0.9682(10) 0.078(4) Uani 1 1 d . . .
F14 F 0.9153(7) 0.1697(7) 0.9285(8) 0.069(3) Uani 1 1 d . . .
F15 F 0.8901(6) 0.3470(6) 1.0621(7) 0.055(2) Uani 1 1 d . . .
F16 F 0.8176(7) 0.2191(8) 1.0235(10) 0.083(4) Uani 1 1 d . . .
F21 F 0.5563(12) 0.6856(17) 0.8005(18) 0.203(13) Uani 1 1 d . . .
F22 F 0.5558(10) 0.5404(16) 0.7997(14) 0.168(10) Uani 1 1 d . . .
F23 F 0.4410(7) 0.6148(11) 0.8369(9) 0.087(4) Uani 1 1 d . . .
F31 F 0.4402(12) 0.2055(15) 0.7108(17) 0.174(10) Uani 1 1 d . . .
F32 F 0.5609(9) 0.0557(15) 0.7894(16) 0.157(9) Uani 1 1 d . . .
F33 F 0.5470(10) 0.1301(12) 0.6528(12) 0.120(6) Uani 1 1 d . . .
P1 P 0.9028(2) 0.2580(2) 0.9952(2) 0.0317(7) Uani 1 1 d . . .
P2 P 0.5000 0.6137(4) 0.7500 0.0427(13) Uani 1 2 d S . .
P3 P 0.5000 0.1290(5) 0.7500 0.0496(15) Uani 1 2 d S . .
S1 S 0.0000 0.4294(3) 0.7500 0.0271(9) Uani 1 2 d S . .
S2 S 0.0000 -0.0740(3) 0.7500 0.0280(9) Uani 1 2 d S . .
Ag1 Ag 0.15842(7) 0.37415(6) 0.81177(9) 0.0373(3) Uani 1 1 d . . .
Ag2 Ag 0.17471(7) 0.87265(7) 0.73846(9) 0.0396(3) Uani 1 1 d . . .
 
loop_
 _atom_site_aniso_label
 _atom_site_aniso_U_11
 _atom_site_aniso_U_22
 _atom_site_aniso_U_33
 _atom_site_aniso_U_23
 _atom_site_aniso_U_13
 _atom_site_aniso_U_12
C1 0.021(6) 0.032(7) 0.042(7) 0.001(6) -0.005(5) 0.002(5)
C2 0.023(6) 0.026(6) 0.043(7) 0.008(6) 0.002(5) -0.004(5)
C3 0.021(6) 0.027(6) 0.036(7) 0.007(5) 0.001(5) 0.007(5)
C4 0.025(6) 0.024(6) 0.024(6) 0.002(5) 0.002(5) 0.001(5)
C5 0.024(6) 0.025(6) 0.030(6) 0.002(5) 0.000(5) 0.001(5)
C6 0.031(6) 0.024(6) 0.031(6) 0.002(5) -0.006(5) -0.002(5)
C7 0.028(6) 0.023(6) 0.027(6) -0.006(5) -0.006(5) 0.002(5)
C8 0.021(6) 0.033(7) 0.054(9) -0.002(6) -0.003(6) -0.003(5)
C9 0.019(6) 0.031(7) 0.047(8) -0.002(6) 0.000(5) 0.000(5)
C10 0.032(7) 0.022(6) 0.038(7) 0.000(5) 0.009(5) -0.001(5)
C11 0.049(9) 0.044(9) 0.035(8) 0.004(7) 0.003(7) 0.007(7)
C12 0.058(11) 0.072(13) 0.060(11) -0.004(10) -0.006(9) -0.008(10)
C13 0.052(10) 0.029(7) 0.053(9) 0.000(7) -0.003(7) -0.002(7)
C14 0.089(15) 0.052(11) 0.064(12) 0.010(9) -0.029(11) 0.000(10)
C15 0.029(7) 0.034(8) 0.073(11) -0.001(8) 0.000(7) 0.012(6)
C16 0.041(10) 0.14(2) 0.039(9) -0.004(11) -0.006(7) -0.026(12)
C17 0.088(15) 0.064(12) 0.047(10) 0.001(9) -0.002(10) -0.018(11)
C18 0.053(12) 0.098(18) 0.078(14) -0.003(13) 0.016(10) 0.003(12)
C19 0.103(19) 0.071(15) 0.069(14) -0.010(11) 0.031(13) -0.036(14)
C20 0.20(3) 0.060(13) 0.026(9) -0.006(8) -0.021(13) 0.037(17)
C21 0.071(16) 0.061(14) 0.18(3) 0.007(17) 0.018(18) 0.010(12)
C22 0.063(12) 0.026(8) 0.089(14) -0.001(8) 0.008(11) 0.003(8)
N1 0.019(5) 0.021(5) 0.042(6) 0.003(4) 0.003(4) 0.000(4)
N2 0.027(5) 0.023(5) 0.038(6) -0.003(5) 0.004(4) -0.004(4)
N3 0.033(6) 0.017(5) 0.033(6) 0.002(4) -0.002(4) -0.001(4)
N4 0.029(6) 0.020(5) 0.035(6) 0.001(4) 0.003(4) 0.001(4)
N5 0.075(10) 0.047(8) 0.043(8) -0.007(6) 0.001(7) 0.001(8)
N6 0.043(8) 0.030(7) 0.116(14) 0.003(8) -0.017(9) -0.005(6)
N7 0.041(8) 0.040(8) 0.105(13) -0.010(8) -0.003(8) 0.002(7)
F11 0.103(9) 0.058(7) 0.086(8) 0.031(6) -0.052(7) 0.001(6)
F12 0.151(13) 0.074(8) 0.045(6) 0.006(6) -0.022(7) 0.030(8)
F13 0.068(7) 0.058(7) 0.114(10) -0.003(7) 0.045(7) -0.005(6)
F14 0.086(8) 0.051(6) 0.073(7) -0.022(5) 0.021(6) 0.015(6)
F15 0.069(6) 0.043(5) 0.052(5) -0.020(4) 0.008(5) -0.013(5)
F16 0.060(7) 0.079(8) 0.114(10) -0.042(7) 0.031(7) -0.037(6)
F21 0.139(15) 0.22(2) 0.26(3) -0.17(2) 0.100(17) -0.125(16)
F22 0.108(12) 0.24(2) 0.162(16) 0.136(17) 0.052(11) 0.108(14)
F23 0.042(6) 0.150(13) 0.070(7) -0.020(8) 0.010(5) -0.012(7)
F31 0.119(14) 0.18(2) 0.23(2) 0.104(18) 0.069(15) 0.088(14)
F32 0.071(10) 0.183(19) 0.22(2) 0.107(17) 0.036(12) 0.054(11)
F33 0.124(13) 0.132(14) 0.113(12) -0.004(10) 0.081(11) 0.000(11)
P1 0.0348(18) 0.0297(17) 0.0306(17) 0.0014(14) 0.0015(14) 0.0039(14)
P2 0.026(3) 0.040(3) 0.062(4) 0.000 0.005(2) 0.000
P3 0.028(3) 0.051(3) 0.072(4) 0.000 0.017(3) 0.000
S1 0.023(2) 0.0171(19) 0.041(2) 0.000 -0.0021(17) 0.000
S2 0.026(2) 0.0164(19) 0.042(2) 0.000 0.0056(18) 0.000
Ag1 0.0395(6) 0.0175(5) 0.0530(7) 0.0022(4) -0.0107(5) 0.0004(4)
Ag2 0.0431(6) 0.0176(5) 0.0594(7) -0.0041(5) 0.0124(5) 0.0011(4)
 
_geom_special_details
;
 All esds (except the esd in the dihedral angle between two l.s. planes)
 are estimated using the full covariance matrix.  The cell esds are taken
 into account individually in the estimation of esds in distances, angles
 and torsion angles; correlations between esds in cell parameters are only
 used when they are defined by crystal symmetry.  An approximate (isotropic)
 treatment of cell esds is used for estimating esds involving l.s. planes.
;
 
loop_
 _geom_bond_atom_site_label_1
 _geom_bond_atom_site_label_2
 _geom_bond_distance
 _geom_bond_site_symmetry_2
 _geom_bond_publ_flag
C1 N1 1.367(16) . ?
C1 C2 1.372(18) . ?
C2 N2 1.381(16) . ?
C3 N2 1.358(16) . ?
C3 C4 1.372(17) . ?
C4 N1 1.362(15) . ?
C4 C5 1.551(17) . ?
C5 S1 1.834(12) . ?
C6 N3 1.372(16) . ?
C6 C7 1.404(17) . ?
C7 N4 1.345(16) 1_545 ?
C7 C10 1.526(17) . ?
C8 N3 1.346(17) . ?
C8 C9 1.379(19) 1_545 ?
C9 N4 1.361(16) . ?
C9 C8 1.379(19) 1_565 ?
C10 S2 1.839(13) . ?
C11 N5 1.16(2) . ?
C11 C12 1.45(2) . ?
C13 N6 1.14(2) . ?
C13 C14 1.46(2) . ?
C15 C16 1.29(3) . ?
C15 C20 1.39(3) . ?
C15 Ag2 2.654(18) 2_656 ?
C16 C17 1.41(3) . ?
C17 C18 1.38(3) . ?
C18 C19 1.34(3) . ?
C19 C20 1.50(4) . ?
C21 C22 1.46(3) . ?
C22 N7 1.12(2) . ?
N1 Ag1 2.420(10) . ?
N2 Ag2 2.310(10) . ?
N3 Ag1 2.294(10) . ?
N4 C7 1.345(16) 1_565 ?
N4 Ag2 2.345(10) . ?
N5 Ag1 2.461(14) . ?
N7 Ag2 2.506(16) . ?
F11 P1 1.594(10) . ?
F12 P1 1.613(11) . ?
F13 P1 1.625(11) . ?
F14 P1 1.611(10) . ?
F15 P1 1.624(9) . ?
F16 P1 1.576(11) . ?
F21 P2 1.538(15) . ?
F22 P2 1.542(14) . ?
F23 P2 1.595(11) . ?
F31 P3 1.561(17) . ?
F32 P3 1.539(16) . ?
F33 P3 1.599(12) . ?
P2 F21 1.538(15) 2_656 ?
P2 F22 1.542(14) 2_656 ?
P2 F23 1.595(11) 2_656 ?
P3 F32 1.539(16) 2_656 ?
P3 F31 1.561(17) 2_656 ?
P3 F33 1.599(12) 2_656 ?
S1 C5 1.834(12) 2_556 ?
S1 Ag1 2.7903(16) 2_556 ?
S1 Ag1 2.7903(16) . ?
S2 C10 1.839(13) 2_556 ?
S2 Ag2 2.9688(16) 1_545 ?
S2 Ag2 2.9688(16) 2_546 ?
Ag2 C15 2.654(18) 2_656 ?
Ag2 S2 2.9688(16) 1_565 ?
 
loop_
 _geom_angle_atom_site_label_1
 _geom_angle_atom_site_label_2
 _geom_angle_atom_site_label_3
 _geom_angle
 _geom_angle_site_symmetry_1
 _geom_angle_site_symmetry_3
 _geom_angle_publ_flag
N1 C1 C2 122.3(12) . . ?
C1 C2 N2 121.5(12) . . ?
N2 C3 C4 123.3(11) . . ?
N1 C4 C3 121.3(11) . . ?
N1 C4 C5 116.7(10) . . ?
C3 C4 C5 121.9(11) . . ?
C4 C5 S1 111.4(8) . . ?
N3 C6 C7 121.0(12) . . ?
N4 C7 C6 121.4(12) 1_545 . ?
N4 C7 C10 118.0(11) 1_545 . ?
C6 C7 C10 120.6(11) . . ?
N3 C8 C9 122.2(12) . 1_545 ?
N4 C9 C8 121.7(12) . 1_565 ?
C7 C10 S2 113.2(9) . . ?
N5 C11 C12 179.0(19) . . ?
N6 C13 C14 179(2) . . ?
C16 C15 C20 119.3(18) . . ?
C16 C15 Ag2 91.3(12) . 2_656 ?
C20 C15 Ag2 101.6(11) . 2_656 ?
C15 C16 C17 125(2) . . ?
C18 C17 C16 118(2) . . ?
C19 C18 C17 122(2) . . ?
C18 C19 C20 118(2) . . ?
C15 C20 C19 118.4(18) . . ?
N7 C22 C21 179(3) . . ?
C4 N1 C1 116.3(10) . . ?
C4 N1 Ag1 118.7(8) . . ?
C1 N1 Ag1 119.0(8) . . ?
C3 N2 C2 115.3(10) . . ?
C3 N2 Ag2 126.9(8) . . ?
C2 N2 Ag2 117.7(8) . . ?
C8 N3 C6 116.5(11) . . ?
C8 N3 Ag1 122.1(9) . . ?
C6 N3 Ag1 121.3(9) . . ?
C7 N4 C9 117.1(11) 1_565 . ?
C7 N4 Ag2 121.8(8) 1_565 . ?
C9 N4 Ag2 119.7(8) . . ?
C11 N5 Ag1 135.4(13) . . ?
C22 N7 Ag2 166.3(18) . . ?
F16 P1 F11 90.7(8) . . ?
F16 P1 F14 90.1(6) . . ?
F11 P1 F14 90.7(7) . . ?
F16 P1 F12 92.1(8) . . ?
F11 P1 F12 176.2(7) . . ?
F14 P1 F12 91.9(6) . . ?
F16 P1 F15 90.0(6) . . ?
F11 P1 F15 89.5(6) . . ?
F14 P1 F15 179.9(7) . . ?
F12 P1 F15 88.0(6) . . ?
F16 P1 F13 178.6(7) . . ?
F11 P1 F13 88.8(7) . . ?
F14 P1 F13 91.2(6) . . ?
F12 P1 F13 88.4(8) . . ?
F15 P1 F13 88.8(6) . . ?
F21 P2 F21 94(2) . 2_656 ?
F21 P2 F22 179.2(18) . 2_656 ?
F21 P2 F22 87.3(14) 2_656 2_656 ?
F21 P2 F22 87.3(14) . . ?
F21 P2 F22 179.2(18) 2_656 . ?
F22 P2 F22 92(2) 2_656 . ?
F21 P2 F23 88.2(9) . 2_656 ?
F21 P2 F23 91.0(9) 2_656 2_656 ?
F22 P2 F23 91.9(8) 2_656 2_656 ?
F22 P2 F23 88.9(8) . 2_656 ?
F21 P2 F23 91.0(9) . . ?
F21 P2 F23 88.2(9) 2_656 . ?
F22 P2 F23 88.9(8) 2_656 . ?
F22 P2 F23 91.9(8) . . ?
F23 P2 F23 178.8(12) 2_656 . ?
F32 P3 F32 91.6(18) 2_656 . ?
F32 P3 F31 90.0(13) 2_656 . ?
F32 P3 F31 178.3(14) . . ?
F32 P3 F31 178.3(14) 2_656 2_656 ?
F32 P3 F31 90.0(13) . 2_656 ?
F31 P3 F31 88(2) . 2_656 ?
F32 P3 F33 88.6(10) 2_656 2_656 ?
F32 P3 F33 92.2(10) . 2_656 ?
F31 P3 F33 88.1(10) . 2_656 ?
F31 P3 F33 91.1(10) 2_656 2_656 ?
F32 P3 F33 92.2(10) 2_656 . ?
F32 P3 F33 88.6(10) . . ?
F31 P3 F33 91.1(10) . . ?
F31 P3 F33 88.1(10) 2_656 . ?
F33 P3 F33 178.9(13) 2_656 . ?
C5 S1 C5 100.4(8) 2_556 . ?
C5 S1 Ag1 93.9(4) 2_556 2_556 ?
C5 S1 Ag1 107.7(4) . 2_556 ?
C5 S1 Ag1 107.7(4) 2_556 . ?
C5 S1 Ag1 93.9(4) . . ?
Ag1 S1 Ag1 146.32(17) 2_556 . ?
C10 S2 C10 99.3(9) . 2_556 ?
C10 S2 Ag2 86.5(4) . 1_545 ?
C10 S2 Ag2 113.7(4) 2_556 1_545 ?
C10 S2 Ag2 113.7(4) . 2_546 ?
C10 S2 Ag2 86.5(4) 2_556 2_546 ?
Ag2 S2 Ag2 149.49(16) 1_545 2_546 ?
N3 Ag1 N1 147.1(4) . . ?
N3 Ag1 N5 119.1(4) . . ?
N1 Ag1 N5 90.0(4) . . ?
N3 Ag1 S1 107.6(3) . . ?
N1 Ag1 S1 75.2(2) . . ?
N5 Ag1 S1 106.2(4) . . ?
N2 Ag2 N4 166.6(4) . . ?
N2 Ag2 N7 92.2(4) . . ?
N4 Ag2 N7 85.8(4) . . ?
N2 Ag2 C15 88.0(4) . 2_656 ?
N4 Ag2 C15 105.2(4) . 2_656 ?
N7 Ag2 C15 108.4(5) . 2_656 ?
N2 Ag2 S2 104.2(3) . 1_565 ?
N4 Ag2 S2 73.4(3) . 1_565 ?
N7 Ag2 S2 153.2(4) . 1_565 ?
C15 Ag2 S2 93.4(3) 2_656 1_565 ?
 
_diffrn_measured_fraction_theta_max    0.961
_diffrn_reflns_theta_full              26.91
_diffrn_measured_fraction_theta_full   0.961
_refine_diff_density_max    4.198
_refine_diff_density_min   -1.823
_refine_diff_density_rms    0.289
#===END
#  CIF produced by WinGX routine CIF_UPDATE
#  Created on 2003-11-28 at 14:33:12
#  Using CIFtbx version 2.6.2 16 Jun 1998
 
#  Dictionary name : cif_core.dic
#  Dictionary vers : 2.2
#  Request file    : c:\wingx\files\archive.dat
#  CIF files read  : lh33 import dreduc struct
 
 
data_'[Ag(L)](PF6) Compound 2'
 
_audit_creation_date            2003-11-28T14:33:12-00:00
_audit_creation_method         'WinGX routine CIF_UPDATE'
_audit_conform_dict_name        cif_core.dic
_audit_conform_dict_version     2.2
_audit_conform_dict_location    ftp://ftp.iucr.org/pub/cif_core.dic
_publ_requested_category        FM
 
#----------------------------------------------------------------------------#
#                   CHEMICAL INFORMATION                                     #
#----------------------------------------------------------------------------#
 
_chemical_name_systematic
;
 ?
;
_chemical_name_common                   CBC
_chemical_formula_moiety                'C10 H10 Ag1 F6 N4 P1 S1'
_chemical_formula_sum                   'C10 H10 Ag1 F6 N4 P S'
_chemical_formula_weight                471.12
_chemical_compound_source               'synthesis as described'
 
#----------------------------------------------------------------------------#
#                   UNIT CELL INFORMATION                                    #
#----------------------------------------------------------------------------#
 
_symmetry_cell_setting                  monoclinic
_symmetry_space_group_name_H-M          P21/c
_symmetry_space_group_name_Hall         '-P 2ybc'
_symmetry_Int_Tables_number             14
loop_
    _symmetry_equiv_pos_as_xyz
'x, y, z'
'-x, y+1/2, -z+1/2'
'-x, -y, -z'
'x, -y-1/2, z-1/2'
 
_cell_length_a                          9.9188(2)
_cell_length_b                          12.8858(5)
_cell_length_c                          11.7449(4)
_cell_angle_alpha                       90
_cell_angle_beta                        100.646(2)
_cell_angle_gamma                       90
_cell_volume                            1475.30(8)
_cell_formula_units_Z                   4
_cell_measurement_temperature           150(2)
_cell_measurement_reflns_used           4319
_cell_measurement_theta_min             3
_cell_measurement_theta_max             30.034
_cell_measurement_wavelength            0.71073
 
#----------------------------------------------------------------------------#
#                   CRYSTAL INFORMATION                                      #
#----------------------------------------------------------------------------#
 
_exptl_crystal_description              prism
_exptl_crystal_colour                   Tan
_exptl_crystal_size_max                 0.25
_exptl_crystal_size_mid                 0.25
_exptl_crystal_size_min                 0.15
_exptl_crystal_density_diffrn           2.121
_exptl_crystal_density_method           'not measured'
_exptl_crystal_F_000                    920
_exptl_special_details
;
 ?
;
 
#----------------------------------------------------------------------------#
#                   ABSORPTION CORRECTION                                    #
#----------------------------------------------------------------------------#
 
_exptl_absorpt_coefficient_mu           1.684
_exptl_absorpt_correction_type          none
 
#----------------------------------------------------------------------------#
#                   DATA COLLECTION                                          #
#----------------------------------------------------------------------------#
 
_diffrn_source                          'Enraf Nonius FR590'
_diffrn_ambient_temperature             150(2)
_diffrn_radiation_wavelength            0.71073
_diffrn_radiation_type                  MoK\a
_diffrn_radiation_monochromator         graphite
_diffrn_radiation_probe                 x-ray
_diffrn_detector                        'CCD plate'
_diffrn_orient_matrix_type              'by Nonius Collect from scalepack cell'
_diffrn_orient_matrix_ub_11             -0.0274039
_diffrn_orient_matrix_ub_12             -0.0069542
_diffrn_orient_matrix_ub_13             0.0774183
_diffrn_orient_matrix_ub_21             -0.025462
_diffrn_orient_matrix_ub_22             0.0751581
_diffrn_orient_matrix_ub_23             -0.0021549
_diffrn_orient_matrix_ub_31             -0.0955209
_diffrn_orient_matrix_ub_32             -0.018039
_diffrn_orient_matrix_ub_33             -0.0388238
_diffrn_measurement_device              '95mm CCD camera on \k-goniostat'
_diffrn_measurement_device_type         KappaCCD
_diffrn_measurement_method              'CCD; rotation images; thick slices'
_diffrn_reflns_av_R_equivalents         0.0201
_diffrn_reflns_av_unetI/netI            0.0317
_diffrn_reflns_number                   8258
_diffrn_reflns_limit_h_min              -13
_diffrn_reflns_limit_h_max              13
_diffrn_reflns_limit_k_min              -18
_diffrn_reflns_limit_k_max              18
_diffrn_reflns_limit_l_min              -16
_diffrn_reflns_limit_l_max              16
_diffrn_reflns_theta_min                3.16
_diffrn_reflns_theta_max                30
_diffrn_reflns_theta_full               30
_diffrn_measured_fraction_theta_full
                                        0.996
_diffrn_measured_fraction_theta_max
                                        0.996
_reflns_number_total                    4291
_reflns_number_gt                       3501
_reflns_threshold_expression            >2sigma(I)
 
#----------------------------------------------------------------------------#
#                   COMPUTER PROGRAMS USED                                   #
#----------------------------------------------------------------------------#
 
_computing_data_collection              'Collect (Nonius BV, 1997-2000)'
_computing_cell_refinement
                                       'HKL Scalepack (Otwinowski & Minor 1997)'
_computing_data_reduction
                             'HKL Denzo and Scalepack (Otwinowski & Minor 1997)'
_computing_structure_solution           'SHELXS-97 (Sheldrick, 1997)'
_computing_structure_refinement         'SHELXL-97 (Sheldrick, 1997)'
_computing_molecular_graphics           'Ortep-3 for Windows (Farrugia, 1997)'
_computing_publication_material
                                   'WinGX publication routines (Farrugia, 1999)'
 
#----------------------------------------------------------------------------#
#                   REFINEMENT INFORMATION                                   #
#----------------------------------------------------------------------------#
 
_refine_special_details
;
 Refinement of F^2^ against ALL reflections.  The weighted R-factor wR and
 goodness of fit S are based on F^2^, conventional R-factors R are based
 on F, with F set to zero for negative F^2^. The threshold expression of
 F^2^ > 2sigma(F^2^) is used only for calculating R-factors(gt) etc. and is
 not relevant to the choice of reflections for refinement.  R-factors based
 on F^2^ are statistically about twice as large as those based on F, and R-
 factors based on ALL data will be even larger.
;
_refine_ls_structure_factor_coef        Fsqd
_refine_ls_matrix_type                  full
_refine_ls_weighting_scheme             calc
_refine_ls_weighting_details
         'calc w=1/[\s^2^(Fo^2^)+(0.0247P)^2^+0.8496P] where P=(Fo^2^+2Fc^2^)/3'
_atom_sites_solution_primary            direct
_atom_sites_solution_secondary          difmap
_atom_sites_solution_hydrogens          geom
_refine_ls_hydrogen_treatment           constr
_refine_ls_extinction_method            none
_refine_ls_number_reflns                4291
_refine_ls_number_parameters            208
_refine_ls_number_restraints            0
_refine_ls_R_factor_all                 0.0404
_refine_ls_R_factor_gt                  0.0276
_refine_ls_wR_factor_ref                0.0620
_refine_ls_wR_factor_gt                 0.0575
_refine_ls_goodness_of_fit_ref          1.053
_refine_ls_restrained_S_all             1.053
_refine_ls_shift/su_max                 0.001
_refine_ls_shift/su_mean                0
_refine_diff_density_max                0.453
_refine_diff_density_min                -0.742
_refine_diff_density_rms                0.091
 
#----------------------------------------------------------------------------#
#                   ATOMIC TYPES, COORDINATES AND THERMAL PARAMETERS         #
#----------------------------------------------------------------------------#
 
loop_
    _atom_type_symbol
    _atom_type_description
    _atom_type_scat_dispersion_real
    _atom_type_scat_dispersion_imag
    _atom_type_scat_source
C C 0.0033 0.0016 'International Tables Vol C Tables 4.2.6.8 and 6.1.1.4'
H H 0 0 'International Tables Vol C Tables 4.2.6.8 and 6.1.1.4'
Ag Ag -0.8971 1.1015 'International Tables Vol C Tables 4.2.6.8 and 6.1.1.4'
F F 0.0171 0.0103 'International Tables Vol C Tables 4.2.6.8 and 6.1.1.4'
N N 0.0061 0.0033 'International Tables Vol C Tables 4.2.6.8 and 6.1.1.4'
P P 0.1023 0.0942 'International Tables Vol C Tables 4.2.6.8 and 6.1.1.4'
S S 0.1246 0.1234 'International Tables Vol C Tables 4.2.6.8 and 6.1.1.4'
 
loop_
    _atom_site_label
    _atom_site_type_symbol
    _atom_site_fract_x
    _atom_site_fract_y
    _atom_site_fract_z
    _atom_site_U_iso_or_equiv
    _atom_site_adp_type
    _atom_site_occupancy
    _atom_site_symmetry_multiplicity
    _atom_site_calc_flag
    _atom_site_refinement_flags
    _atom_site_disorder_assembly
    _atom_site_disorder_group
C1 C 0.0432(2) 0.13841(18) 0.74508(19) 0.0275(5) Uani 1 1 d . . .
H1 H 0.029 0.2044 0.777 0.033 Uiso 1 1 calc R . .
C2 C -0.0688(2) 0.08510(18) 0.68535(18) 0.0250(4) Uani 1 1 d . . .
H2 H -0.1574 0.1153 0.6771 0.03 Uiso 1 1 calc R . .
C3 C 0.0729(2) -0.04607(17) 0.65220(17) 0.0218(4) Uani 1 1 d . . .
H3 H 0.0871 -0.112 0.6201 0.026 Uiso 1 1 calc R . .
C4 C 0.1854(2) 0.00839(17) 0.71168(16) 0.0203(4) Uani 1 1 d . . .
C5 C 0.3274(2) -0.03552(19) 0.72394(17) 0.0245(4) Uani 1 1 d . . .
H5A H 0.3216 -0.1122 0.7232 0.029 Uiso 1 1 calc R . .
H5B H 0.3813 -0.0143 0.7999 0.029 Uiso 1 1 calc R . .
C6 C 0.4964(2) 0.12752(18) 0.66562(19) 0.0257(4) Uani 1 1 d . . .
H6A H 0.5429 0.1165 0.7468 0.031 Uiso 1 1 calc R . .
H6B H 0.5675 0.1464 0.6203 0.031 Uiso 1 1 calc R . .
C7 C 0.3988(2) 0.21709(17) 0.66243(17) 0.0208(4) Uani 1 1 d . . .
C8 C 0.3903(2) 0.27356(17) 0.76161(17) 0.0229(4) Uani 1 1 d . . .
H8 H 0.4495 0.2561 0.8322 0.027 Uiso 1 1 calc R . .
C9 C 0.2250(2) 0.37630(18) 0.65912(18) 0.0263(4) Uani 1 1 d . . .
H9 H 0.1626 0.4328 0.6547 0.032 Uiso 1 1 calc R . .
C10 C 0.2343(2) 0.32110(18) 0.55940(17) 0.0288(5) Uani 1 1 d . . .
H10 H 0.1795 0.3417 0.4879 0.035 Uiso 1 1 calc R . .
Ag1 Ag 0.258262(16) 0.087768(14) 0.438380(13) 0.02539(6) Uani 1 1 d . . .
F1 F 0.23719(17) 0.65978(19) 0.63747(13) 0.0647(6) Uani 1 1 d . . .
F2 F 0.36721(19) 0.62299(19) 0.50550(17) 0.0717(6) Uani 1 1 d . . .
F3 F 0.1475(2) 0.56827(14) 0.47709(19) 0.0719(6) Uani 1 1 d . . .
F4 F 0.20793(19) 0.69550(13) 0.36612(12) 0.0507(4) Uani 1 1 d . . .
F5 F 0.29629(18) 0.78699(15) 0.52482(16) 0.0598(5) Uani 1 1 d . . .
F6 F 0.07866(15) 0.73289(13) 0.50003(13) 0.0431(4) Uani 1 1 d . . .
N1 N 0.17016(18) 0.10078(15) 0.75951(15) 0.0250(4) Uani 1 1 d . . .
N2 N -0.05497(17) -0.00810(14) 0.63892(14) 0.0216(4) Uani 1 1 d . . .
N3 N 0.30180(18) 0.35158(14) 0.76095(14) 0.0232(4) Uani 1 1 d . . .
N4 N 0.31797(19) 0.24005(15) 0.56087(15) 0.0250(4) Uani 1 1 d . . .
P1 P 0.22244(6) 0.67649(5) 0.50184(5) 0.02838(13) Uani 1 1 d . . .
S1 S 0.41776(5) 0.00633(4) 0.60974(4) 0.01968(10) Uani 1 1 d . . .
 
loop_
    _atom_site_aniso_label
    _atom_site_aniso_U_11
    _atom_site_aniso_U_22
    _atom_site_aniso_U_33
    _atom_site_aniso_U_23
    _atom_site_aniso_U_13
    _atom_site_aniso_U_12
C1 0.0297(12) 0.0240(11) 0.0303(11) -0.0062(9) 0.0093(9) -0.0011(9)
C2 0.0215(10) 0.0279(11) 0.0261(10) 0.0009(9) 0.0062(8) 0.0021(9)
C3 0.0252(10) 0.0212(10) 0.0203(9) -0.0015(8) 0.0076(8) 0.0018(8)
C4 0.0216(10) 0.0252(11) 0.0153(8) 0.0043(8) 0.0070(7) 0.0012(8)
C5 0.0210(10) 0.0338(12) 0.0199(9) 0.0074(9) 0.0068(7) 0.0039(9)
C6 0.0163(10) 0.0326(12) 0.0276(10) -0.0046(9) 0.0021(8) -0.0014(9)
C7 0.0180(9) 0.0235(11) 0.0208(9) -0.0025(8) 0.0035(7) -0.0049(8)
C8 0.0194(10) 0.0285(11) 0.0195(9) -0.0021(8) 0.0004(7) -0.0038(8)
C9 0.0342(12) 0.0218(11) 0.0212(10) -0.0009(8) 0.0011(8) 0.0015(9)
C10 0.0416(13) 0.0245(11) 0.0176(9) 0.0013(8) -0.0014(9) 0.0019(10)
Ag1 0.02676(9) 0.03210(10) 0.01645(7) -0.00171(6) 0.00178(6) -0.00441(7)
F1 0.0476(10) 0.1216(18) 0.0238(7) 0.0163(10) 0.0035(6) 0.0117(10)
F2 0.0523(11) 0.1037(17) 0.0599(11) 0.0034(11) 0.0128(9) 0.0417(11)
F3 0.0966(16) 0.0296(10) 0.0818(15) 0.0072(9) -0.0036(12) -0.0132(9)
F4 0.0859(12) 0.0456(10) 0.0220(7) -0.0017(7) 0.0137(7) 0.0203(9)
F5 0.0566(11) 0.0606(12) 0.0669(12) -0.0274(9) 0.0238(9) -0.0304(9)
F6 0.0316(7) 0.0558(10) 0.0413(8) -0.0007(7) 0.0051(6) 0.0066(7)
N1 0.0241(9) 0.0286(10) 0.0232(8) -0.0028(7) 0.0069(7) -0.0032(7)
N2 0.0206(9) 0.0252(9) 0.0190(8) 0.0003(7) 0.0037(6) 0.0001(7)
N3 0.0252(9) 0.0244(9) 0.0193(8) -0.0027(7) 0.0027(7) -0.0023(7)
N4 0.0333(10) 0.0233(9) 0.0179(8) -0.0007(7) 0.0033(7) 0.0000(8)
P1 0.0305(3) 0.0325(3) 0.0215(3) 0.0001(2) 0.0033(2) 0.0010(3)
S1 0.0179(2) 0.0234(3) 0.0189(2) 0.00083(19) 0.00630(17) 0.00265(19)
 
 
#----------------------------------------------------------------------------#
#                   MOLECULAR GEOMETRY                                       #
#----------------------------------------------------------------------------#
 
_geom_special_details
;
 All esds (except the esd in the dihedral angle between two l.s. planes)
 are estimated using the full covariance matrix.  The cell esds are taken
 into account individually in the estimation of esds in distances, angles
 and torsion angles; correlations between esds in cell parameters are only
 used when they are defined by crystal symmetry.  An approximate (isotropic)
 treatment of cell esds is used for estimating esds involving l.s. planes.
;
loop_
    _geom_bond_atom_site_label_1
    _geom_bond_atom_site_label_2
    _geom_bond_distance
    _geom_bond_site_symmetry_2
    _geom_bond_publ_flag
C1 N1 1.331(3) . ?
C1 C2 1.382(3) . ?
C1 H1 0.95 . ?
C2 N2 1.336(3) . ?
C2 H2 0.95 . ?
C3 N2 1.342(3) . ?
C3 C4 1.391(3) . ?
C3 H3 0.95 . ?
C4 N1 1.337(3) . ?
C4 C5 1.500(3) . ?
C5 S1 1.827(2) . ?
C5 H5A 0.99 . ?
C5 H5B 0.99 . ?
C6 C7 1.502(3) . ?
C6 S1 1.813(2) . ?
C6 H6A 0.99 . ?
C6 H6B 0.99 . ?
C7 N4 1.341(3) . ?
C7 C8 1.389(3) . ?
C8 N3 1.334(3) . ?
C8 H8 0.95 . ?
C9 N3 1.333(3) . ?
C9 C10 1.388(3) . ?
C9 H9 0.95 . ?
C10 N4 1.332(3) . ?
C10 H10 0.95 . ?
Ag1 N2 2.2951(17) 3_556 ?
Ag1 N3 2.3393(17) 4_565 ?
Ag1 N4 2.4405(18) . ?
Ag1 S1 2.5453(5) . ?
F1 P1 1.5872(16) . ?
F2 P1 1.5862(17) . ?
F3 P1 1.5817(19) . ?
F4 P1 1.5928(15) . ?
F5 P1 1.6013(18) . ?
F6 P1 1.5973(16) . ?
N2 Ag1 2.2951(17) 3_556 ?
N3 Ag1 2.3393(17) 4_566 ?
 
loop_
    _geom_angle_atom_site_label_1
    _geom_angle_atom_site_label_2
    _geom_angle_atom_site_label_3
    _geom_angle
    _geom_angle_site_symmetry_1
    _geom_angle_site_symmetry_3
    _geom_angle_publ_flag
N1 C1 C2 122.4(2) . . ?
N1 C1 H1 118.8 . . ?
C2 C1 H1 118.8 . . ?
N2 C2 C1 121.4(2) . . ?
N2 C2 H2 119.3 . . ?
C1 C2 H2 119.3 . . ?
N2 C3 C4 121.8(2) . . ?
N2 C3 H3 119.1 . . ?
C4 C3 H3 119.1 . . ?
N1 C4 C3 121.19(19) . . ?
N1 C4 C5 118.20(19) . . ?
C3 C4 C5 120.6(2) . . ?
C4 C5 S1 113.43(14) . . ?
C4 C5 H5A 108.9 . . ?
S1 C5 H5A 108.9 . . ?
C4 C5 H5B 108.9 . . ?
S1 C5 H5B 108.9 . . ?
H5A C5 H5B 107.7 . . ?
C7 C6 S1 114.88(14) . . ?
C7 C6 H6A 108.5 . . ?
S1 C6 H6A 108.5 . . ?
C7 C6 H6B 108.5 . . ?
S1 C6 H6B 108.5 . . ?
H6A C6 H6B 107.5 . . ?
N4 C7 C8 120.8(2) . . ?
N4 C7 C6 117.91(18) . . ?
C8 C7 C6 121.33(18) . . ?
N3 C8 C7 122.12(19) . . ?
N3 C8 H8 118.9 . . ?
C7 C8 H8 118.9 . . ?
N3 C9 C10 121.2(2) . . ?
N3 C9 H9 119.4 . . ?
C10 C9 H9 119.4 . . ?
N4 C10 C9 121.97(19) . . ?
N4 C10 H10 119 . . ?
C9 C10 H10 119 . . ?
N2 Ag1 N3 95.18(6) 3_556 4_565 ?
N2 Ag1 N4 133.84(6) 3_556 . ?
N3 Ag1 N4 101.06(6) 4_565 . ?
N2 Ag1 S1 120.05(5) 3_556 . ?
N3 Ag1 S1 130.70(4) 4_565 . ?
N4 Ag1 S1 79.49(4) . . ?
C1 N1 C4 116.66(18) . . ?
C2 N2 C3 116.50(18) . . ?
C2 N2 Ag1 114.49(14) . 3_556 ?
C3 N2 Ag1 128.73(15) . 3_556 ?
C9 N3 C8 116.87(18) . . ?
C9 N3 Ag1 123.41(15) . 4_566 ?
C8 N3 Ag1 118.45(13) . 4_566 ?
C10 N4 C7 116.93(18) . . ?
C10 N4 Ag1 122.69(14) . . ?
C7 N4 Ag1 112.76(14) . . ?
F3 P1 F2 90.82(13) . . ?
F3 P1 F1 91.03(12) . . ?
F2 P1 F1 89.92(10) . . ?
F3 P1 F4 89.95(11) . . ?
F2 P1 F4 90.46(10) . . ?
F1 P1 F4 178.94(11) . . ?
F3 P1 F6 90.60(11) . . ?
F2 P1 F6 178.48(12) . . ?
F1 P1 F6 89.52(9) . . ?
F4 P1 F6 90.07(9) . . ?
F3 P1 F5 178.88(11) . . ?
F2 P1 F5 89.90(12) . . ?
F1 P1 F5 89.83(11) . . ?
F4 P1 F5 89.19(10) . . ?
F6 P1 F5 88.69(10) . . ?
C6 S1 C5 103.00(11) . . ?
C6 S1 Ag1 95.39(7) . . ?
C5 S1 Ag1 112.61(7) . . ?
#===END 
#  CIF produced by WinGX routine CIF_UPDATE
#  Created on 2002-02-14 at 00:05:12
#  Using CIFtbx version 2.6.2 16 Jun 1998
 
#  Dictionary name : cif_core.dic
#  Dictionary vers : 2.2
#  Request file    : c:\wingx\files\archive.dat
#  CIF files read  : lh7 import dreduc struct
 
 
data_'[Ag(L)](BF4).1/2MeNO2 Compound 3'
 
_audit_creation_date            2002-02-14T00:05:12-00:00
_audit_creation_method         'WinGX routine CIF_UPDATE'
_audit_conform_dict_name        cif_core.dic
_audit_conform_dict_version     2.2
_audit_conform_dict_location    ftp://ftp.iucr.org/pub/cif_core.dic
_publ_requested_category        FM
 
#----------------------------------------------------------------------------#
#                   CHEMICAL INFORMATION                                     #
#----------------------------------------------------------------------------#
 
_chemical_name_systematic
;
 ?
;
_chemical_name_common                   JAAGB
_chemical_formula_moiety                'C11 H23 Ag2 B2 F8 N9 O2 S2'
_chemical_formula_structural            'C11 H23 AG2 B2 F8 N9 O2 S2'
_chemical_formula_sum                   'C21 H23 Ag2 B2 F8 N9 O2 S2'
_chemical_formula_weight                889.96
_chemical_compound_source               'synthesis as described'
 
#----------------------------------------------------------------------------#
#                   UNIT CELL INFORMATION                                    #
#----------------------------------------------------------------------------#
 
_symmetry_cell_setting                  monoclinic
_symmetry_space_group_name_H-M          P21/a
_symmetry_space_group_name_Hall         '-P 2yab'
_symmetry_Int_Tables_number             14
loop_
    _symmetry_equiv_pos_as_xyz
'x, y, z'
'-x+1/2, y+1/2, -z'
'-x, -y, -z'
'x-1/2, -y-1/2, z'
 
_cell_length_a                          10.7108(1)
_cell_length_b                          13.2616(2)
_cell_length_c                          20.7926(3) 
_cell_angle_alpha                       90
_cell_angle_beta                        92.5034(4)
_cell_angle_gamma                       90
_cell_volume                            2950.61(7)
_cell_formula_units_Z                   4
_cell_measurement_temperature           123(2)
_cell_measurement_reflns_used           6844
_cell_measurement_theta_min             2.91
_cell_measurement_theta_max             27.485
_cell_measurement_wavelength            0.71073
 
#----------------------------------------------------------------------------#
#                   CRYSTAL INFORMATION                                      #
#----------------------------------------------------------------------------#
 
_exptl_crystal_description              plate
_exptl_crystal_colour                   colourless
_exptl_crystal_size_max                 0.4
_exptl_crystal_size_mid                 0.4
_exptl_crystal_size_min                 0.18
_exptl_crystal_density_diffrn           1.997
_exptl_crystal_density_method           'not measured'
_exptl_crystal_F_000                    1744
_exptl_special_details
;
 ?
;
 
#----------------------------------------------------------------------------#
#                   ABSORPTION CORRECTION                                    #
#----------------------------------------------------------------------------#
 
_exptl_absorpt_coefficient_mu           1.56
_exptl_absorpt_correction_type          none
 
#----------------------------------------------------------------------------#
#                   DATA COLLECTION                                          #
#----------------------------------------------------------------------------#
 
_diffrn_source                          'Enraf Nonius FR590'
_diffrn_ambient_temperature             123(2)
_diffrn_radiation_wavelength            0.71073
_diffrn_radiation_type                  MoK\a
_diffrn_radiation_monochromator         graphite
_diffrn_radiation_probe                 x-ray
_diffrn_detector                        'CCD plate'
_diffrn_orient_matrix_type              'by Nonius Collect from scalepack cell'
_diffrn_orient_matrix_ub_11             0.528348E-1
_diffrn_orient_matrix_ub_12             -0.415147E-1
_diffrn_orient_matrix_ub_13             -0.283512E-1
_diffrn_orient_matrix_ub_21             -0.75893E-1
_diffrn_orient_matrix_ub_22             -0.378474E-1
_diffrn_orient_matrix_ub_23             -0.160211E-1
_diffrn_orient_matrix_ub_31             -0.134975E-1
_diffrn_orient_matrix_ub_32             0.503003E-1
_diffrn_orient_matrix_ub_33             -0.354541E-1
_diffrn_measurement_device              '95mm CCD camera on \k-goniostat'
_diffrn_measurement_device_type         KappaCCD
_diffrn_measurement_method              'CCD; rotation images; thick slices'
_diffrn_reflns_av_R_equivalents         0.0179
_diffrn_reflns_av_unetI/netI            0.0278
_diffrn_reflns_number                   12595
_diffrn_reflns_limit_h_min              -13
_diffrn_reflns_limit_h_max              13
_diffrn_reflns_limit_k_min              -17
_diffrn_reflns_limit_k_max              17
_diffrn_reflns_limit_l_min              -26
_diffrn_reflns_limit_l_max              26
_diffrn_reflns_theta_min                2.94
_diffrn_reflns_theta_max                27.47
_diffrn_reflns_theta_full               27.47
_diffrn_measured_fraction_theta_full
                                        0.997
_diffrn_measured_fraction_theta_max
                                        0.997
_reflns_number_total                    6725
_reflns_number_gt                       5973
_reflns_threshold_expression            >2sigma(I)
 
#----------------------------------------------------------------------------#
#                   COMPUTER PROGRAMS USED                                   #
#----------------------------------------------------------------------------#
 
_computing_data_collection              'Collect (Nonius BV, 1997-2000)'
_computing_cell_refinement
                                       'HKL Scalepack (Otwinowski & Minor 1997)'
_computing_data_reduction
                             'HKL Denzo and Scalepack (Otwinowski & Minor 1997)'
_computing_structure_solution           'SHELXS-97 (Sheldrick, 1997)'
_computing_structure_refinement         'SHELXL-97 (Sheldrick, 1997)'
_computing_molecular_graphics           'Ortep-3 for Windows (Farrugia, 1997)'
_computing_publication_material
                                   'WinGX publication routines (Farrugia, 1999)'
 
#----------------------------------------------------------------------------#
#                   REFINEMENT INFORMATION                                   #
#----------------------------------------------------------------------------#
 
_refine_special_details
;
 Refinement of F^2^ against ALL reflections.  The weighted R-factor wR and
 goodness of fit S are based on F^2^, conventional R-factors R are based
 on F, with F set to zero for negative F^2^. The threshold expression of
 F^2^ > 2sigma(F^2^) is used only for calculating R-factors(gt) etc. and is
 not relevant to the choice of reflections for refinement.  R-factors based
 on F^2^ are statistically about twice as large as those based on F, and R-
 factors based on ALL data will be even larger.
;
_refine_ls_structure_factor_coef        Fsqd
_refine_ls_matrix_type                  full
_refine_ls_weighting_scheme             calc
_refine_ls_weighting_details
         'calc w=1/[\s^2^(Fo^2^)+(0.0162P)^2^+3.1966P] where P=(Fo^2^+2Fc^2^)/3'
_atom_sites_solution_primary            direct
_atom_sites_solution_secondary          difmap
_atom_sites_solution_hydrogens          geom
_refine_ls_hydrogen_treatment           constr
_refine_ls_extinction_method            none
_refine_ls_number_reflns                6725
_refine_ls_number_parameters            496
_refine_ls_number_restraints            0
_refine_ls_R_factor_all                 0.0299
_refine_ls_R_factor_gt                  0.0235
_refine_ls_wR_factor_ref                0.0524
_refine_ls_wR_factor_gt                 0.0505
_refine_ls_goodness_of_fit_ref          1.059
_refine_ls_restrained_S_all             1.059
_refine_ls_shift/su_max                 0.019
_refine_ls_shift/su_mean                0.001
_refine_diff_density_max                0.738
_refine_diff_density_min                -0.607
_refine_diff_density_rms                0.076
 
#----------------------------------------------------------------------------#
#                   ATOMIC TYPES, COORDINATES AND THERMAL PARAMETERS         #
#----------------------------------------------------------------------------#
 
loop_
    _atom_type_symbol
    _atom_type_description
    _atom_type_scat_dispersion_real
    _atom_type_scat_dispersion_imag
    _atom_type_scat_source
C C 0.0033 0.0016 'International Tables Vol C Tables 4.2.6.8 and 6.1.1.4'
H H 0 0 'International Tables Vol C Tables 4.2.6.8 and 6.1.1.4'
Ag Ag -0.8971 1.1015 'International Tables Vol C Tables 4.2.6.8 and 6.1.1.4'
B B 0.0013 0.0007 'International Tables Vol C Tables 4.2.6.8 and 6.1.1.4'
F F 0.0171 0.0103 'International Tables Vol C Tables 4.2.6.8 and 6.1.1.4'
N N 0.0061 0.0033 'International Tables Vol C Tables 4.2.6.8 and 6.1.1.4'
S S 0.1246 0.1234 'International Tables Vol C Tables 4.2.6.8 and 6.1.1.4'
Cl Cl 0.1484 0.1585 'International Tables Vol C Tables 4.2.6.8 and 6.1.1.4'
O O 0.0106 0.006 'International Tables Vol C Tables 4.2.6.8 and 6.1.1.4'
 
loop_
    _atom_site_label
    _atom_site_type_symbol
    _atom_site_fract_x
    _atom_site_fract_y
    _atom_site_fract_z
    _atom_site_U_iso_or_equiv
    _atom_site_adp_type
    _atom_site_occupancy
    _atom_site_symmetry_multiplicity
    _atom_site_calc_flag
    _atom_site_refinement_flags
    _atom_site_disorder_assembly
    _atom_site_disorder_group
Ag1 Ag 0.194705(16) 0.190070(12) 0.069066(8) 0.01963(5) Uani 1 1 d . . .
Ag2 Ag 0.098974(14) -0.005864(12) 0.401098(7) 0.01529(5) Uani 1 1 d . . .
S1 S -0.04315(5) 0.23640(4) 0.10417(2) 0.01456(11) Uani 1 1 d . . .
S2 S 0.02388(4) 0.12382(4) 0.48366(2) 0.01195(10) Uani 1 1 d . . .
N1 N 0.18394(16) 0.14170(13) 0.18023(8) 0.0157(4) Uani 1 1 d . . .
N2 N 0.13938(16) 0.05943(14) 0.30021(9) 0.0173(4) Uani 1 1 d . . .
N3 N 0.28678(16) -0.14724(13) -0.03161(8) 0.0147(4) Uani 1 1 d . . .
N4 N 0.24609(17) 0.04306(14) 0.02072(9) 0.0178(4) Uani 1 1 d . . .
N5 N -0.02829(15) -0.13805(13) 0.36288(8) 0.0137(4) Uani 1 1 d . . .
N6 N -0.19718(17) -0.28150(14) 0.31256(9) 0.0183(4) Uani 1 1 d . . .
N7 N -0.03427(16) 0.35392(13) 0.53198(9) 0.0173(4) Uani 1 1 d . . .
N8 N 0.19680(16) 0.44982(13) 0.55499(9) 0.0166(4) Uani 1 1 d . . .
C1 C 0.2536(2) 0.06710(17) 0.20541(11) 0.0193(5) Uani 1 1 d . . .
H1 H 0.319(2) 0.041(2) 0.1821(13) 0.025(7) Uiso 1 1 d . . .
C2 C 0.2312(2) 0.02525(17) 0.26456(11) 0.0184(4) Uani 1 1 d . . .
H2 H 0.278(2) -0.0305(19) 0.2812(12) 0.020(6) Uiso 1 1 d . . .
C3 C 0.0691(2) 0.13467(16) 0.27510(10) 0.0167(4) Uani 1 1 d . . .
H3 H 0.002(2) 0.1576(17) 0.2999(11) 0.014(6) Uiso 1 1 d . . .
C4 C 0.08994(18) 0.17521(15) 0.21494(10) 0.0134(4) Uani 1 1 d . . .
C5 C 0.0081(2) 0.25812(16) 0.18766(11) 0.0164(4) Uani 1 1 d . . .
H5A H -0.063(2) 0.2653(18) 0.2123(11) 0.017(6) Uiso 1 1 d . . .
H5B H 0.055(3) 0.319(2) 0.1869(14) 0.035(8) Uiso 1 1 d . . .
C6 C 0.1264(2) -0.11833(17) -0.11645(11) 0.0170(4) Uani 1 1 d . . .
H6A H 0.185(2) -0.1288(18) -0.1513(12) 0.021(6) Uiso 1 1 d . . .
H6B H 0.070(2) -0.0681(19) -0.1293(12) 0.019(6) Uiso 1 1 d . . .
C7 C 0.19792(18) -0.08596(15) -0.05634(10) 0.0138(4) Uani 1 1 d . . .
C8 C 0.1757(2) 0.00770(16) -0.02902(10) 0.0163(4) Uani 1 1 d . . .
H8 H 0.113(2) 0.0495(17) -0.0439(11) 0.009(5) Uiso 1 1 d . . .
C9 C 0.3377(2) -0.01725(17) 0.04338(11) 0.0201(5) Uani 1 1 d . . .
H9 H 0.389(3) 0.006(2) 0.0782(15) 0.037(8) Uiso 1 1 d . . .
C10 C 0.3566(2) -0.11294(18) 0.01863(11) 0.0194(5) Uani 1 1 d . . .
H10 H 0.414(2) -0.1554(19) 0.0356(12) 0.020(6) Uiso 1 1 d . . .
C11 C -0.0125(2) -0.18303(16) 0.30603(11) 0.0168(4) Uani 1 1 d . . .
H11 H 0.052(2) -0.1627(17) 0.2836(11) 0.012(6) Uiso 1 1 d . . .
C12 C -0.0958(2) -0.25471(17) 0.28143(11) 0.0185(4) Uani 1 1 d . . .
H12 H -0.082(2) -0.2851(18) 0.2429(12) 0.018(6) Uiso 1 1 d . . .
C13 C -0.21362(19) -0.23434(16) 0.36827(10) 0.0156(4) Uani 1 1 d . . .
H13 H -0.286(2) -0.2508(17) 0.3914(11) 0.012(5) Uiso 1 1 d . . .
C14 C -0.13021(18) -0.16419(15) 0.39439(10) 0.0124(4) Uani 1 1 d . . .
C15 C -0.15343(18) -0.11271(16) 0.45713(10) 0.0132(4) Uani 1 1 d . . .
H15A H -0.160(2) -0.0405(19) 0.4494(11) 0.014(6) Uiso 1 1 d . . .
H15B H -0.232(2) -0.1359(18) 0.4757(11) 0.017(6) Uiso 1 1 d . . .
C16 C 0.0532(2) 0.24749(16) 0.44890(10) 0.0156(4) Uani 1 1 d . . .
H16A H -0.016(2) 0.2607(19) 0.4203(12) 0.024(7) Uiso 1 1 d . . .
H16B H 0.128(2) 0.2435(18) 0.4242(12) 0.018(6) Uiso 1 1 d . . .
C17 C 0.06617(18) 0.32930(15) 0.49845(10) 0.0141(4) Uani 1 1 d . . .
C18 C 0.18019(19) 0.37782(16) 0.51006(10) 0.0154(4) Uani 1 1 d . . .
H18 H 0.253(2) 0.3584(19) 0.4845(12) 0.026(7) Uiso 1 1 d . . .
C19 C 0.0962(2) 0.47513(16) 0.58740(11) 0.0173(4) Uani 1 1 d . . .
H19 H 0.105(2) 0.5274(18) 0.6201(11) 0.014(6) Uiso 1 1 d . . .
C20 C -0.0181(2) 0.42715(16) 0.57553(11) 0.0176(4) Uani 1 1 d . . .
H20 H -0.086(2) 0.443(2) 0.5993(12) 0.027(7) Uiso 1 1 d . . .
C21 C 0.2223(2) -0.40746(19) 0.20530(14) 0.0315(6) Uani 1 1 d . . .
H21A H 0.2053 -0.3351 0.2087 0.047 Uiso 1 1 calc R . .
H21B H 0.2778 -0.4193 0.1698 0.047 Uiso 1 1 calc R . .
H21C H 0.2627 -0.4315 0.2456 0.047 Uiso 1 1 calc R . .
N9 N 0.10392(18) -0.46226(15) 0.19284(11) 0.0260(5) Uani 1 1 d . . .
O1 O 0.08932(18) -0.50880(14) 0.14227(10) 0.0386(5) Uani 1 1 d . . .
O2 O 0.02654(18) -0.45993(15) 0.23402(11) 0.0429(5) Uani 1 1 d . . .
B1 B 0.0764(3) -0.1720(2) 0.12671(15) 0.0289(6) Uani 1 1 d . . .
F1 F 0.05912(16) -0.15917(15) 0.06095(8) 0.0520(5) Uani 1 1 d . . .
F2 F 0.20111(15) -0.16774(14) 0.14591(10) 0.0529(5) Uani 1 1 d . . .
F3 F 0.01138(16) -0.09624(13) 0.15834(9) 0.0477(4) Uani 1 1 d . . .
F4 F 0.02740(14) -0.26498(12) 0.14359(8) 0.0402(4) Uani 1 1 d . . .
B2 B 0.2349(3) 0.3709(2) 0.32540(13) 0.0246(6) Uani 1 1 d . . .
F5 F 0.25571(13) 0.36504(11) 0.26038(7) 0.0312(3) Uani 1 1 d . . .
F6 F 0.10779(13) 0.37040(12) 0.33496(8) 0.0377(4) Uani 1 1 d . . .
F7 F 0.29059(15) 0.28831(16) 0.35665(9) 0.0544(5) Uani 1 1 d . . .
F8 F 0.2861(2) 0.45831(17) 0.35007(10) 0.0754(7) Uani 1 1 d . . .
 
loop_
    _atom_site_aniso_label
    _atom_site_aniso_U_11
    _atom_site_aniso_U_22
    _atom_site_aniso_U_33
    _atom_site_aniso_U_23
    _atom_site_aniso_U_13
    _atom_site_aniso_U_12
Ag1 0.03191(10) 0.01175(8) 0.01560(9) 0.00027(6) 0.00511(7) 0.00007(7)
Ag2 0.01601(8) 0.01706(8) 0.01287(8) 0.00058(6) 0.00154(6) -0.00189(6)
S1 0.0164(2) 0.0135(2) 0.0136(3) 0.0014(2) -0.00190(19) -0.00104(19)
S2 0.0114(2) 0.0123(2) 0.0121(2) 0.00034(19) 0.00036(18) -0.00131(18)
N1 0.0175(9) 0.0154(9) 0.0143(9) 0.0033(7) 0.0015(7) 0.0009(7)
N2 0.0188(9) 0.0194(9) 0.0138(9) 0.0033(7) 0.0017(7) 0.0003(7)
N3 0.0160(9) 0.0151(9) 0.0131(9) -0.0010(7) 0.0008(7) 0.0016(7)
N4 0.0213(9) 0.0163(9) 0.0157(9) -0.0025(7) 0.0008(7) -0.0003(7)
N5 0.0132(8) 0.0141(8) 0.0138(9) 0.0016(7) 0.0006(7) 0.0020(7)
N6 0.0210(9) 0.0157(9) 0.0181(10) -0.0021(7) -0.0016(7) -0.0003(7)
N7 0.0144(9) 0.0167(9) 0.0208(10) 0.0012(8) 0.0008(7) 0.0015(7)
N8 0.0168(9) 0.0134(9) 0.0194(9) 0.0028(7) -0.0008(7) -0.0002(7)
C1 0.0198(11) 0.0208(11) 0.0174(11) 0.0006(9) 0.0041(9) 0.0040(9)
C2 0.0207(11) 0.0167(11) 0.0177(11) 0.0031(9) 0.0009(9) 0.0038(9)
C3 0.0160(10) 0.0179(11) 0.0162(11) -0.0014(9) 0.0013(8) 0.0009(8)
C4 0.0160(10) 0.0122(10) 0.0117(10) -0.0020(8) -0.0014(8) -0.0024(8)
C5 0.0192(11) 0.0139(10) 0.0156(11) -0.0008(9) -0.0036(9) 0.0010(9)
C6 0.0217(11) 0.0145(10) 0.0145(11) 0.0027(9) -0.0016(9) -0.0052(9)
C7 0.0143(9) 0.0145(10) 0.0127(10) 0.0005(8) 0.0021(8) -0.0016(8)
C8 0.0175(10) 0.0158(10) 0.0155(11) 0.0002(8) -0.0005(8) 0.0010(9)
C9 0.0199(11) 0.0232(12) 0.0169(11) -0.0056(9) -0.0043(9) -0.0005(9)
C10 0.0179(11) 0.0211(11) 0.0190(11) -0.0007(9) -0.0025(9) 0.0033(9)
C11 0.0168(10) 0.0178(11) 0.0160(11) 0.0014(9) 0.0034(8) 0.0033(9)
C12 0.0218(11) 0.0182(11) 0.0155(11) -0.0025(9) 0.0000(9) 0.0052(9)
C13 0.0140(10) 0.0162(10) 0.0165(11) 0.0018(9) -0.0004(8) 0.0009(8)
C14 0.0131(9) 0.0122(9) 0.0118(10) 0.0026(8) -0.0014(8) 0.0026(8)
C15 0.0098(9) 0.0155(10) 0.0142(10) -0.0003(8) -0.0003(8) 0.0002(8)
C16 0.0164(10) 0.0149(10) 0.0153(11) 0.0029(8) 0.0000(9) -0.0018(8)
C17 0.0153(10) 0.0116(9) 0.0155(10) 0.0049(8) 0.0003(8) 0.0009(8)
C18 0.0155(10) 0.0133(10) 0.0176(11) 0.0044(8) 0.0029(8) 0.0005(8)
C19 0.0191(11) 0.0141(10) 0.0184(11) 0.0008(9) -0.0012(8) 0.0011(8)
C20 0.0147(10) 0.0172(11) 0.0212(11) 0.0022(9) 0.0033(9) 0.0029(8)
C21 0.0233(12) 0.0239(13) 0.0467(17) -0.0060(12) -0.0038(11) -0.0048(10)
N9 0.0212(10) 0.0154(9) 0.0410(13) -0.0003(9) -0.0014(9) 0.0021(8)
O1 0.0401(11) 0.0285(10) 0.0458(12) -0.0090(9) -0.0148(9) 0.0010(8)
O2 0.0301(10) 0.0352(11) 0.0646(14) 0.0079(10) 0.0156(10) 0.0051(8)
B1 0.0240(14) 0.0316(15) 0.0316(16) 0.0121(13) 0.0060(12) 0.0069(12)
F1 0.0518(10) 0.0726(12) 0.0329(9) 0.0240(9) 0.0161(8) 0.0250(9)
F2 0.0293(9) 0.0507(11) 0.0780(14) 0.0173(10) -0.0048(8) 0.0000(8)
F3 0.0542(10) 0.0413(10) 0.0480(11) 0.0028(8) 0.0066(8) 0.0188(8)
F4 0.0375(9) 0.0369(9) 0.0466(10) 0.0129(8) 0.0045(7) -0.0009(7)
B2 0.0276(14) 0.0308(15) 0.0156(13) -0.0012(11) 0.0031(10) -0.0070(12)
F5 0.0355(8) 0.0402(9) 0.0181(7) -0.0054(6) 0.0043(6) -0.0025(7)
F6 0.0270(8) 0.0429(9) 0.0441(9) 0.0195(8) 0.0130(7) 0.0087(7)
F7 0.0289(8) 0.0864(14) 0.0485(11) 0.0373(10) 0.0086(7) 0.0175(9)
F8 0.0987(17) 0.0784(15) 0.0504(12) -0.0400(11) 0.0176(11) -0.0534(13)
 
 
#----------------------------------------------------------------------------#
#                   MOLECULAR GEOMETRY                                       #
#----------------------------------------------------------------------------#
 
_geom_special_details
;
 All esds (except the esd in the dihedral angle between two l.s. planes)
 are estimated using the full covariance matrix.  The cell esds are taken
 into account individually in the estimation of esds in distances, angles
 and torsion angles; correlations between esds in cell parameters are only
 used when they are defined by crystal symmetry.  An approximate (isotropic)
 treatment of cell esds is used for estimating esds involving l.s. planes.
;
loop_
    _geom_bond_atom_site_label_1
    _geom_bond_atom_site_label_2
    _geom_bond_distance
    _geom_bond_site_symmetry_2
    _geom_bond_publ_flag
Ag1 N4 2.2722(18) . ?
Ag1 N3 2.3053(17) 2 ?
Ag1 N1 2.4063(18) . ?
Ag1 S1 2.7501(5) . ?
Ag2 N2 2.3274(18) . ?
Ag2 N5 2.3383(17) . ?
Ag2 N8 2.4061(17) 2_546 ?
Ag2 S2 2.5831(5) . ?
S1 C5 1.821(2) . ?
S1 C6 1.826(2) 3 ?
S2 C15 1.820(2) 3_556 ?
S2 C16 1.825(2) . ?
N1 C1 1.333(3) . ?
N1 C4 1.340(3) . ?
N2 C2 1.336(3) . ?
N2 C3 1.342(3) . ?
N3 C7 1.337(3) . ?
N3 C10 1.338(3) . ?
N3 Ag1 2.3053(17) 2_545 ?
N4 C9 1.336(3) . ?
N4 C8 1.338(3) . ?
N5 C11 1.341(3) . ?
N5 C14 1.343(3) . ?
N6 C13 1.335(3) . ?
N6 C12 1.336(3) . ?
N7 C20 1.334(3) . ?
N7 C17 1.347(3) . ?
N8 C19 1.338(3) . ?
N8 C18 1.342(3) . ?
N8 Ag2 2.4061(17) 2_556 ?
C1 C2 1.380(3) . ?
C3 C4 1.388(3) . ?
C4 C5 1.502(3) . ?
C6 C7 1.500(3) . ?
C6 S1 1.826(2) 3 ?
C7 C8 1.391(3) . ?
C9 C10 1.388(3) . ?
C11 C12 1.386(3) . ?
C13 C14 1.384(3) . ?
C14 C15 1.503(3) . ?
C15 S2 1.820(2) 3_556 ?
C16 C17 1.499(3) . ?
C17 C18 1.392(3) . ?
C19 C20 1.392(3) . ?
C21 N9 1.475(3) . ?
N9 O2 1.218(3) . ?
N9 O1 1.223(3) . ?
B1 F2 1.378(3) . ?
B1 F1 1.382(3) . ?
B1 F4 1.392(3) . ?
B1 F3 1.402(3) . ?
B2 F8 1.373(3) . ?
B2 F5 1.382(3) . ?
B2 F6 1.384(3) . ?
B2 F7 1.394(3) . ?
 
loop_
    _geom_angle_atom_site_label_1
    _geom_angle_atom_site_label_2
    _geom_angle_atom_site_label_3
    _geom_angle
    _geom_angle_site_symmetry_1
    _geom_angle_site_symmetry_3
    _geom_angle_publ_flag
N4 Ag1 N3 128.87(6) . 2 ?
N4 Ag1 N1 102.64(6) . . ?
N3 Ag1 N1 125.62(6) 2 . ?
N4 Ag1 S1 123.66(5) . . ?
N3 Ag1 S1 88.56(4) 2 . ?
N1 Ag1 S1 73.79(4) . . ?
N2 Ag2 N5 95.81(6) . . ?
N2 Ag2 N8 103.36(6) . 2_546 ?
N5 Ag2 N8 116.91(6) . 2_546 ?
N2 Ag2 S2 115.27(5) . . ?
N5 Ag2 S2 122.08(4) . . ?
N8 Ag2 S2 102.40(4) 2_546 . ?
C5 S1 C6 97.54(10) . 3 ?
C5 S1 Ag1 92.53(7) . . ?
C6 S1 Ag1 108.03(8) 3 . ?
C15 S2 C16 101.63(10) 3_556 . ?
C15 S2 Ag2 98.36(7) 3_556 . ?
C16 S2 Ag2 105.74(7) . . ?
C1 N1 C4 117.11(18) . . ?
C1 N1 Ag1 121.72(14) . . ?
C4 N1 Ag1 119.84(13) . . ?
C2 N2 C3 116.75(18) . . ?
C2 N2 Ag2 122.97(14) . . ?
C3 N2 Ag2 120.28(14) . . ?
C7 N3 C10 117.26(18) . . ?
C7 N3 Ag1 120.60(13) . 2_545 ?
C10 N3 Ag1 121.92(14) . 2_545 ?
C9 N4 C8 116.33(19) . . ?
C9 N4 Ag1 123.10(14) . . ?
C8 N4 Ag1 120.22(14) . . ?
C11 N5 C14 116.83(18) . . ?
C11 N5 Ag2 122.61(14) . . ?
C14 N5 Ag2 120.13(13) . . ?
C13 N6 C12 115.88(19) . . ?
C20 N7 C17 116.39(18) . . ?
C19 N8 C18 116.34(18) . . ?
C19 N8 Ag2 119.09(14) . 2_556 ?
C18 N8 Ag2 121.91(14) . 2_556 ?
N1 C1 C2 122.2(2) . . ?
N2 C2 C1 121.3(2) . . ?
N2 C3 C4 121.96(19) . . ?
N1 C4 C3 120.72(19) . . ?
N1 C4 C5 118.63(18) . . ?
C3 C4 C5 120.65(19) . . ?
C4 C5 S1 113.02(15) . . ?
C7 C6 S1 111.34(15) . 3 ?
N3 C7 C8 121.16(19) . . ?
N3 C7 C6 118.39(18) . . ?
C8 C7 C6 120.38(19) . . ?
N4 C8 C7 121.9(2) . . ?
N4 C9 C10 122.2(2) . . ?
N3 C10 C9 121.0(2) . . ?
N5 C11 C12 121.8(2) . . ?
N6 C12 C11 121.8(2) . . ?
N6 C13 C14 123.24(19) . . ?
N5 C14 C13 120.43(19) . . ?
N5 C14 C15 118.36(18) . . ?
C13 C14 C15 121.16(18) . . ?
C14 C15 S2 113.59(14) . 3_556 ?
C17 C16 S2 113.00(15) . . ?
N7 C17 C18 120.8(2) . . ?
N7 C17 C16 118.61(18) . . ?
C18 C17 C16 120.56(19) . . ?
N8 C18 C17 122.6(2) . . ?
N8 C19 C20 121.1(2) . . ?
N7 C20 C19 122.7(2) . . ?
O2 N9 O1 123.5(2) . . ?
O2 N9 C21 118.1(2) . . ?
O1 N9 C21 118.4(2) . . ?
F2 B1 F1 111.6(2) . . ?
F2 B1 F4 109.5(2) . . ?
F1 B1 F4 108.8(3) . . ?
F2 B1 F3 109.3(3) . . ?
F1 B1 F3 109.2(2) . . ?
F4 B1 F3 108.4(2) . . ?
F8 B2 F5 109.5(2) . . ?
F8 B2 F6 109.3(2) . . ?
F5 B2 F6 110.0(2) . . ?
F8 B2 F7 109.5(2) . . ?
F5 B2 F7 109.1(2) . . ?
F6 B2 F7 109.5(2) . . ?
#===END 

 
